# Supplementary material for: Predictors of prodromal Parkinson’s disease in young adult Pink1−/− rats
Source: Front Behav Neurosci. 2022 Sep 12;16:867958. doi: 10.3389/fnbeh.2022.867958 (PMC9510667; doi:10.3389/fnbeh.2022.867958)
Supplement: Supplementary file 7 [file Table_7.XLSX]

## Sheet: S1
Supplementary Table 7. NanoString CodeSet Gene List.
Gene Name	Accession Number	Target Sequence
Abca12	XM_001054709.6	ACACCTCACTGAATAGTATATTTGGCGTTCTTCAAAAGGCAAACAGGGTACTGCTGGTAGTGCGGGAGGTTTACCCACGTGTTCAAACTGATGAAGGATT
Acsbg1	NM_134389.1	TTTAATTCTGGCTTCTTGGAAACTAGTATCACTCTGCCACCTCACACACGAGAGAGAAGCTTGATGCTTAATAATCTGCTGCTGCCGCTGTGACTGTATT
Actb	NM_031144.2	CCCGCGAGTACAACCTTCTTGCAGCTCCTCCGTCGCCGGTCCACACCCGCCACCAGTTCGCCATGGATGACGATATCGCTGCGCTCGTCGTCGACAACGG
Ada	NM_130399.2	CCAGACTTCCTGGCCAAGTTCGATTACTACATGCCTGCCATCGCGGGCTGCAGGGAGGCCATCAAGAGAATCGCCTATGAATTTGTGGAGATGAAGGCAA
Adgrf2	XM_017596752.1	GTGGACTAAAAACCATAACAGATACATTGATGGAAAAATGTCCAAAGGACTTGTCTTGTGTGATCAGAGGCATTGAGAAATCTCCTCGGATACCAGGGAA
Adgrf4	XM_006244640.2	GTACAATGCTACAGAGGACGTCTTAGTGCTGATCGAAATTCCTAGGCAAGCATTACAGGAGCTGTCGTCCAATACGTCCCAAGCCATTGCCGTAGCGTTT
Adipor2	NM_001037979.1	CTATGGAACGAATGGAAGAGTTTGTTTGTAAGGTGTGGGAAGGTCGATGGCGAGTGATCCCTCATGATGTGCTGCCAGATTGGCTTAAGGACAATGACTT
Akr1b8	NM_173136.1	ACCTCTTCATTGTCAGCAAGTTGTGGCCCACCTGCTTTGAGAAAAAACTGCTAAAGGAAGCCTTTCAGAAGACCCTCACGGATCTCAAGCTGGACTACTT
Alox12b	NM_001039377.1	CCTGGGTATTATTTCCGTGACGACAGCTTGGCGGTGTGGTATGCCATGGAGAGGTACGTGACAGAGATCATCACTTATTATTACCCGAATGACGCAGCTG
Aloxe3	NM_001105793.1	ATGAGCACAGGGCTGGCCCACTTCACCTACACGGATTTCTGCCTTCCGGATAGCCTACGGGCTCGTGGTGTCCTGACCATTCCCAACTACCACTACCGAG
apolipoprotein-A1	NM_012738.1	GGACAGGGTGAAGGATTTCGCCACTGTGTATGTGGATGCAGTCAAGGACAGCGGCAGAGACTATGTGTCCCAGTTTGAATCCTCCACTTTGGGCAAACAG
Apol3	NM_001013175.1	TTGTCCTGGGTCAGAAAGCACTCAAACTTAGTAAAAAAGCCTATGATGTCATCAAACAATTGAAAAGCTTGGGACAGCACATTCGTGCCATTAGGGTAGC
Apol9a	NM_001025066.1	AGGCTTGGGGCTGGGGGTAGCAGCTACTGTGACTAATGTTGCTACTTCAATCATGAAGGAAACAAGCAGGGTTTTGGATGGAGTCGAAGCTGGTCACCAT
aTP13a2	NM_001173432.1	GTCTTCAAGTATATGGCCCTATACAGCCTGACCCAGTTCATCTCTGTCCTCATTCTCTACACAATCAACACCAACCTGGGAGACCTACAGTTCTTGGCCA
Atp1a3	NM_012506.1	TCAAGAGGGACGTGGCGGGTGATGCCTCAGAGTCCGCCCTGCTTAAGTGCATCGAGCTGTCCTCGGGTTCCGTAAAGCTGATGCGCGAACGAAACAAGAA
Atp6ap1l	NM_001191843.1	ACACAGACTTTCAACTACAATCTGAGCAAAGCACACTGGAGTACATTCAGCCATCACAATCCTGTTAAGTTCTCCAGGGATGGGATTCCCTGCATCCTCT
SCA2	XM_003752609.1	ACCAACACCACCTTCCATGACACCTGCCTCTAATACACAGTCTCCACAGAGCAGTTTCCCAGCAGCACCACAGACAGTCTTCACCATCCATCCTTCTCAT
B2m	NM_012512.1	CGAGACCGATGTATATGCTTGCAGAGTTAAACACGTCACTCTGAAGGAGCCCAAAACCGTCACCTGGGACCGAGACATGTAATCAAGCTCTATGGAGCTC
BCL7A	XM_017598515.1	TCCCTACGAATCTACAAGTGGGTTCCTGTGACGGAGCCGAAAGTCGATGACAAAAACAAGAATAAGAAGAAAGGCAAGGACGAGAAGTGTGGCTCAGAGG
Casp14	NM_001191776.1	ATGATCCATATCTACTCCACGGTAGAGGGGTTCCTCTCCTATAGACATGACCAGAAAGGCTCTGGCTTCATCCAGACCCTGACGGATGTGTTCATTCATA
Casp7	NM_022260.3	AGGGAAGACAGTTAATACTCTAGTATATAGGACCCAATCCAGAAAACAAGCCATTCTAGGGTATCGGTACAGAAGGGTCGACACAGGGAATTCACTTAAG
Ccl11	NM_019205.1	AAGGAGATGTAGGATTATTGAGGAATAGAAAGGAATGAGTTAGGGGTAACTGAGGATGATAGGAGGACTAAATACTATCAAAGCACCTTATACACATATG
CDC34	NM_001013103.2	ATGACTCTGGCACCGAGGAGTCCTGACCCACGTCCCTGAAATAAACTTACAAATTTTACCTCAGCAGGACCCGTGTGGGCCTCAGGCGACAGACTACCTC
Cdkn1b	NM_031762.3	ACTCCATTGAATGGACATCCTGTATAAGCACTGAGAAAGCAAAAACAATAACACTAAACATTTTAGGCACTCTTAAACCATCTGCCTCTAAAAGCATTGG
Cers3	NM_001127561.1	TTCCAGCATTCCACAAGTCAACCGTCACATAATGAAGTTTACGGACTGGCAAAGAAGTGTAACTTGACAGAGCGCCAGGTTGAAAGATGGTTTAGAATTC
Clca4l	NM_001077356.2	CCAAGCAGCAGAGCTGTACTTAATTCAAATCCTTGAGAAGGAATCCTTGGTCGGCCTGGTCACGTTTGATAGCATTGCTATAGTCCAAAATAACCTCATA
Cldn17	NM_001107112.1	TTCCTTCCAGGCTGGACCAGTAGGCTAAGGAAAGACAATGGCTTTTTATCCCGTTCAGATTGCTGGACTAGTTCTTGGCTTCTTTGGCTTGGTTGGGACA
Clstn1	NM_001007092.1	GGCCTTTTGGCCGGAAGAAGGAGACAATTCTCTGCAGTTCGGATAAAACAGATATGAACCGACACCATTATTCGCTCTATGTCCACGGGTGCAGACTCAT
Cnfn	NM_001108909.1	CAACGATATGCCCGTCTGTCTGTGTGGCACTTTCGCTCCACTGTGCCTCGCCTGCCGCATCTCCGATGACTTTGGGGAGTGCTGTTGTGCGCCATACCTG
Col6a5	XM_008757899.2	ACTATCCATGTGGACAATTTCGACAAACTGAGAGACATTTACTTGCCTCTACAAGAGATTCTGTGCAATAATTCACAAGAGACTTGTAACCTTCCAGAAG
Cpa4	NM_001109346.2	CGGACCACTTTAAGCTCAATGTCTGGAAATCTCCCTCCACTTTTGATCGGCCTGTGGATATTCTCGTCCCTTCTGTCAGCTTGCTGCCAGTCAAGTCCTT
Crabp2	NM_017244.1	GGCTAAAGGACTCGGCGTCCAGTATTCTAGTTGAAGATCTAAAGAGAAAGCCACCTTGCTGCCACTATGCCTAACTTTTCTGGCAACTGGAAGATCATCC
Crisp3	NM_022859.1	CCACTGATGAATGGGATAGAGATCTTGAGAATTTGTCAACCACTAAACTGTCAGTCCAAGAAGAGATCATAAACAAGCACAACCAATTGAGACGAACGGT
Crnn	XM_001055236.3	TTGGTGTTTAAAGTTGCCCGTGCCTGCTTTAAGACACTGAATGAGAGTCCTAAGGGTGCTTGCATGTCTGACAAGTCTGAAAGCTGCCATGTTGGATCTT
Cryab	NM_012935.3	TTTAAGACAAGGAAGTTTCCCATCAGCGAATGAACATCTGTGACTAGTGCCGAAGCTTACTAATGCTAAGGGCTGGCCCAGATTATTAAGCTAATAAAAA
GM-CSF	XM_001074265.1	CCGGAAACTGACTGTGAAATAGAAGTCACCACCTTTGAGGATTTCATAAAGAACCTTAAAGGCTTTCTGTTTGATATCCCTTTTGACTGCTGGAAGCCGG
Csta	NM_001105876.1	GATGATGCCTGGAGGCTTGACACCGGCCAGACCTGCTACCCCAGAAATCCAGGAGATTGCTAACGAGGTCAAAGCACAGCTTGAAGAGCAAACCAACAAA
Cyp2t1	NM_134369.1	CCCACGGAAATGGCATAGTGTTTTCTAATGGGCCCGCGTTGGCGACGCTTCGCACTTTGCACTTGAACACTGAAGAGTTGCGTGGGTCGAGTACCATTGA
Cyp4f39	XM_006225942.3	GACCGCCTTCCGCGTGTACGTCCTATCGGCTCTGCTGCTTTTCCTCCTTTTCCTCCTCTTCCGCCTGCTCCTGCAGGCATTCAAATTATTCAGTGACTTC
Cyyr1	NM_001013980.1	AAGAATAACTCATTAGTGGTGTATGCAGCAGATCAAAACAACCACATTCCCTCAAGTCATAAAGCTTGATCCAGAGCTGGGACCTAACTCTTCATTCTGC
Ddc	NM_001270853.1	GCTGGCCTGATTCCTTTCTTCGTGGTTGTCACCCTAGGAACCACATCTTGCTGCTCTTTTGACAATCTCCTAGAAGTGGGTCCCATCTGCAACCAGGAGG
Ddit4	NM_080906.2	AGCCACACAGGCTTCTGGCTGGATGTGTATGTAGCATGTATCTTATTAATTTTTGTATTACTGACAAGTTACAACAGCAGTTGTGGGCCAGAGTCAGAAG
Dmkn	NM_001173357.1	GCCCGGCTCCCAGCACTCGTGCCTTACTCTACTTCCGCAGACTGTGGGAGAATTTCAAACGCAACACTCCTTTCTTCAACTGGAAACAGATTGAGGGCTC
Dsc1	NM_001106161.1	AATGAAGGAGTCTTGTGTGTTGTCAAGCCATTGAACTATGAAGTCAGCCGCCAAGTCACTCTGCAAATCAGCGTGCTTAACGAAGCCCAGTTCACTAATG
Dsc3	NM_001107402.1	ACAAGTACAAACTGATCTTGAAAGTCCAGGACATGAATGGCCAATTCTTTGGACTCATCAGCACATCAACTTGTATCATAACAGTGCAAGATTCCAATGA
Dsg1	XM_002725320.4	ACAGTGACTATGATCACTGTGAAGGTATTGAATGTCGTCGAGGGCTCTGTGTTCCGACCAGGTTCAAAGACATTTGTGGTACATAGTAGAATGGACGCAA
Dsg3	NM_001191079.1	AATGCAAAGTATGCAATTTAGTATTGCCGTGAGGAACAAAGCTGAGTTCCACCAGTCAGTGATCTCTCAGTACCAAGTGCAGTCAACTCCAGTCACAATT
Eef1a1	NM_175838.1	CTTGGTCGTTTTGCTGTTCGTGACATGAGGCAGACAGTTGCTGTGGGTGTCATCAAAGCCGTGGACAAGAAGGCTGCAGGAGCTGGCAAAGTCACCAAGT
Endou	NM_001191069.1	AGCTTTCTCCGTCACCAAAACCGTTACGGCTCCCAACAGGAGTTCGTGGAAGATTTGAAGAACATGTGGTTTGGGCTCTACTCAAGAGGCAATGAAGAAG
FGF20	NM_023961.1	AATTGACTTCTGAATGCATCTTCAGGGAACAATTTGAAGAGAACTGGTATAATACCTATTCATCCAACATATACAAACACGGAGACACAGGTCGCAGGTA
Gapdh	NM_017008.2	TGGTGAAGGTCGGTGTGAACGGATTTGGCCGTATCGGACGCCTGGTTACCAGGGCTGCCTTCTCTTGTGACAAAGTGGACATTGTTGCCATCAACGACCC
Gdf1	NM_001044240.2	TCATACAGCCCGCCAGAACCTCAGGGCTGTGCCCCGAGTGGACCGTCGTCTTTGACCTGTCGAGCGTGGAGCCCATAGAGCGCCCAACACGCGCGCGCCT
GDNF	NM_019139.1	GGCAAAAATCGGGGGTGCGTCTTAACTGCAATACACTTAAATGTCACTGACTTGGGTTTGGGCTACGAAACCAAGGAGGAACTGATCTTTCGATATTGTA
Gdpd3	XM_002728806.2	CAGTTACAAAATGGGCCATCATGAGGAAAAGTCTGATCCAATACTTGCAGGACCGAGGGGTACAGGTGCTATTTTGGTGCCTTAATGAAGAATCAGATTT
Gfap	NM_017009.1	TACAGACTTTCTCCAACCTCCAGATCCGAGAAACCAGCCTGGACACCAAATCTGTGTCAGAAGGCCACCTCAAGAGGAACATCGTGGTAAAGACGGTGGA
Gja1	NM_012567.2	GAGAAACTAATGTGTTTGACATTCCACGTTAAACTGCTGTCGTGTTCGGCTTCGTAGCATGTAATGTAGACCTAGCCCATCCATTCATGTGCTCGGGAGA
Gja5	NM_019280.1	ACCTTCCTCAGCACCTTCTCTCCCGGGTCTGGATGGTGTTGCTCATTAATCCTCCAAATTTCAGTTCTGAGCCGTATTCTCAAAGATTGGGCTACTCCTC
Gpha2	NM_133619.2	GGTACTCTGTGCTGGTTGCCAGTGGCTATCGACACAACATCACCTCTGTCTCTCAGTGCTGTACCATCAGCAGCCTTAAAAAGGTGAGGGTGTGGCTGCA
Gsdma	NM_001108297.1	GACTTCAAGACATTAAAAGAAGAGGTTCGGCGTGAGACTCGAGAAATAGAGAAGTTGAGTCAAGTGGGGCGAAGCTCCCTACTCACTTCCCTCAGACATC
Gsg1	NM_001013166.1	ACCGAGTCATCTGTAGAAGAGCAGTGTTAGGAGTTAAGTGGGTTTGGGAAGCAGGCTAAGCCCTACCATAGGTGTCATTCGCTATCAACATCTGCTTAAG
Hfe	NM_053301.3	TGATCCTTAAGCTGCTACTTGCAGGCATCCTTCGTTTTCTGCATCCACCTAGACTTCGTATGTCTACTTAAAAAGCCCCACTAAATTTGGGGGACACATG
Hopx	NM_133621.2	ATGGCTTGGCCGGGAGAGGGGTGTGGCTTACGTTTCTCTTTGGATTTTAATGAAAGATGATGTGGGAGCAGTTTTTGTTTGCCCTTGACCGCCACTTTCC
Hpd	NM_017233.1	AGAACGGGGCGCTAAAATTGTACGGGAGCCATGGGTGGAGGAAGACAAATTCGGGAAGGTGAAGTTCGCTGTGCTGCAGACGTATGGAGATACCACGCAC
Hsd17b4	NM_024392.2	CTGAAGGACCCACTGCGTGCTTTAATAAAACCAGAATCATTACGTTCTGTCTACGCAGTCATGCTCCAGCCTTCTTTGAAACGATCCACGGTAATGTGCA
HspB1	NM_031970.3	CTCTTCGATCAAGCTTTCGGGGTGCCTCGGTTTCCCGATGAGTGGTCTCAGTGGTTCAGCTCCGCTGGTTGGCCCGGCTATGTGCGCCCTCTGCCCGCCG
IFNg	NM_138880.2	AAGGACGGTAACACGAAAATACTTGAGAGCCAGATTATCTCTTTCTACCTCAGACTCTTTGAAGTCTTGAAAGACAACCAGGCCATCAGCAACAACATAA
Ighg1	ENSRNOT00000006975.5	AGGTCCATTTCAGCTGGTTTGTAGATGACGTGGAAGTCCACACAGCTCAGACTCGACCACCAGAGGAGCAGTTCAACAGCACTTTCCGCTCAGTCAGTGA
IL-13	NM_053828.1	CTGTGCAGCCCTGGAATCCCTGACCAACATCTCCAGTTGCAATGCCATCCACAGGACCCAGAGGATATTGAATGGCCTCTGTAACCAAAAGGCCTCGGAT
IL-18	NM_019165.1	CTTTGGCAGACTTCACTGTACAACCGCAGTAATACGGAGCATAAATGACCAAGTTCTCTTCGTTGACAAAAGAAACCCGCCTGTGTTCGAGGACATGCCT
IL-1B	NM_031512.1	TGCACTGCAGGCTTCGAGATGAACAACAAAAATGCCTCGTGCTGTCTGACCCATGTGAGCTGAAAGCTCTCCACCTCAATGGACAGAACATAAGCCAACA
IL-2	NM_053836.1	CCTGCAAGCATGTACAGCATGCAGCTCGCATCCTGTGTTGCACTGACGCTTGTCCTCCTTGTCAACAGCGCACCCACTTCAAGCCCTGCAAAGGAAACAC
IL-4	NM_201270.1	TGCTGTCACCCTGTTCTGCTTTCTCATATGTACCGGGAACGGTATCCACGGATGTAACGACAGCCCTCTGAGAGAGATCATCAACACTTTGAACCAGGTC
Irs2	NM_001168633.1	TCAGCATGCAAGGAAATGCTGTAATACACATGGAAGTGGTCAAATCTGGTATTTACTGGCTTACAGTCAAAACTACCACAGTCCTACCTCAGTTCAGGGT
Jchain	ENSRNOT00000004866.6	TGGAGAGGAGTATCCGAATTGTTGTCCCTTTGAACAACAGGGAGAATATCTCCGATCCCACCTCCCCAGTGAGAACGAACTTTGTGTACCATTTGTCAGA
Kif5c	NM_001107730.1	CAAAACTGGTGCCGAGGGAGCTGTTCTTGATGAAGCTAAAAATATCAACAAGTCTTTGTCTGCTCTTGGAAATGTGATCTCTGCCTTGGCAGAAGGGACA
Klk10	NM_001004100.1	GCTCAGGTCCCGTTCTGCCACTCCGCTCAGATGAACACGACCTCATGATGCTAAAACTGAGCAGTCCTGTGGTGCTGACGTCCAAAGTGCATCCCGTGCA
Klk11	NM_001106252.1	CTTCGACTTCTGTTCATCCTTCCCTAAGGAGTCCTCAGCTGGGACCCTTGCATGTATCTCTCCGACCTACCACGAATATGATCAACCAGGGGCTTGTTGG
Klk12	NM_001107508.1	AAACAAGCCGTGGGACCCATTCCCAGATCGGCTCCAGTGCCTCGACCTCTCCATTGTCTCTAACGAGACGTGCCGGGCCGTATTTCCTGGAAGAGTGACA
Klk13	NM_001170405.1	CACTTGATAGATACCCTCTTAGGCCTGGCACCTATGGTGGCTTATGTCTTGGGAAAGAGGTGATGAACAAATGTGGTCATATCCTTAAATTTCAGAAGAA
Klk14	XM_001080394.6	CCACTGCTCTTCAGTGTGTGAATGTCAACATCATGCCGGAGCAGGTATGCCATCGAGCCTACCCTGGAACCATAACCTCTGGCATGGTCTGTGCCGGGGT
Klk6	NM_019175.1	CCTTTGAAGAAAGACTGCTCTGAGAAGAATCCCGACTGTCAGATCCTCGGCTGGGGCAAGATGGAAAACGGTGAATTCCCAGATACCATCCAGTGTGCTG
Klk8	NM_001107509.1	CGGTCTATCCAGCATCCTTGCTTCAACAGTAGCAACCCAGAGGATCACAGCCATGACATAATGCTCATTCGACTGCAGAACTCAGCAAACCTCGGGGACA
Klk9	NM_001106253.1	TCTTCCACTACCTGGACTGGATTGAAAACACCGTGGAAAAATACAATCATACCAACAAGCTTATTTGAGTCCACGCTAAAGACAGACTGGAGAGGAAGAT
Kprp	NM_001002290.1	AGAGTAATGGCTGCTGTGTATCTGGTGGTGTCTTTTCAGGATCACGCGGTTTAAGTGGTTGTGGAGATCAAGGAAACACCTATCGTGGCATGAATTGTGG
Krt1	NM_001008802.2	TCTCCCTTTCCATCAAGGCTAAACGTGGCGGGCAAAACCAAAACCAATTGCACCAGCCTTATTAGAGAAAAGAGCTATGGTTAAATGCTCAGATTAGGCT
Krt13	NM_001004021.1	GGAGGTGGTTTTGGGGCTGGTTCTTGCCAGCTTGGAGGAGGCCGGAATATCTCTACCTGTTCTTCTCGGTTTGTCACTGGAGGATCATCTGGAGGCTACG
krt2	NM_001008899.1	TGGTGGCAGAGGAGGCTCTGGTGGAGGTGGCTTTGGCAGTCAGAGTCTTGTTGGCCTTGGAGGGTACAAGAGCATCTCTAGTAGCGTGGCTGGCTACGGT
Krt78	XM_017595335.1	CTAGCAAGGCCGAGGCTGAGGCTGTGTTCCAGACCAAGTACCAGGAACTCCAGGAATCAGCCCAGCTTCAAGGGAACAGCATGAAGGAAGTGCAGGTGCA
Lce1l	NM_001109493.1	GCTGCTGACCTGGGTCATGAAGACTTCAGACAAGCAGTAAAAGAGGCAGCCATGTTCACAGGACCTGCTCCTACCGCTATGCCTCCCATTCCTTCTTGTC
Lgals7	NM_022582.2	GGCAGACGCCGCCCTGCACTTTAACCCGAGGCTGGACACATCCGAGGTTGTCTTCAACACCAAACAGCAAGGCAAATGGGGCCGTGAGGAGCGGGGCACC
Lrrc63	NM_001024803.1	AGCGCTTTAGTGAAAATCGACCAAAGTGTTTCTCAACCACAAAAACCTGCCAGCGTTCAAAACGTCTGTCTTGATTATGAGCATGATGAACCCGAAAGAG
Ly6d	NM_001130552.1	GACCTGTCCACCCGACTTCTTCTACTGCAGAACAATCACCAAAGTGGAGCCTCTGAAGGGGAACCTGGTGAAAAAAGAGTGTGCAGAGACGTGCACCATC
Ly6g6c	NM_001001969.1	CCTGGAACCCGGCCACAAATGCCTGACAACAAACGTGTACCTTGGGAAGATGTGGGTTTTCTCTAACCTGCGCTGTGGCACACCAGAGGAGCCTTGTCGG
Lypd5	NM_001192010.1	CACCAGGACCAGAGCGCCTGTTTTCAGGGCAACGGCCGGATGACCATTGGCAACTTCTCGGTGCCTGTGTACATCCGAACCTGCCACCGGCCCTCTTGCA
Mocos	NM_001108425.1	GTGTGCAGACAGGGTAAATACTTACGATTGTGGAGAAAATGTTTCAAGATGGCTGTCCAAGTTTTGTGGCCGTCCATGCCATTTAATCAAGCAAAGTCCA
mTOR	NM_019906.1	GTCCAAGGCTTCTTCCGTTCTATCTCCTTGTCGAGAGGCAACAACCTCCAGGATACACTCAGAGTCCTCACCTTGTGGTTTGATTATGGTCACTGGCCAG
Muc15	NM_001044301.1	TCCACAACCTTCAAAGCAACAAATTCCAGCAGAAACTTTCCAACAGCTAGTTCAACTGAGAGTCCAAAACCTCCCTCCACACATTCCATTCCTCCCTTGG
Myh7	NM_017240.1	TGATGCACCTGTAGACAAGGGCAAAGGCAAAGCAAAGAAAGGCTCATCCTTTCAGACCGTGTCCGCACTGCACAGGGAAAATCTGAACAAACTTATGACA
Myl3	NM_012606.2	GCCCGAACGCCCTAAGGAAGCAGAGTTTGATGCCTCCAAGATTAAGATTGAGTTCACGCCTGAACAGATTGAAGAGTTCAAGGAGGCCTTCCAACTGTTT
Mylk3	NM_001110810.1	AAGATATAAACCTCGGGAGAAGCTAAAGGTTAACTTTGGTACTCCAGAGTTCCTGGCTCCAGAAGTTGTTAACTATGAGTTTGTCTCATTCCCAACAGAC
Myoz2	NM_001106469.1	TTCGAACGACTGCTGCTAACAGATCCCAGGTTTTTGGCCTTTGCCAATCCTCTTTCGGGCAGACGATGCTTTAATAGGACACCAAAGGGGTGGATATCTG
Ndnf	XM_008763014.2	AGATGTGGTCGTTAAAAGGAAAGGGAAAAAGTTTCTACGGTTTGCTCCAGTCTCCTCTCACCAAAAAGTCACCCTCTTTATTCACTCTTGTATGGACACT
Nfkb1	XM_342346.3	TTGTCATATACAGATGGTGTCTAGCAATCACGGCTGCACTCGGTGTGGCTTGGGGTATGGTGGCTTGAGCTTTTCCAGCTGCTATTGGATTACACTTGCT
Nipal4	NM_001106995.1	CCCTCAACACCACCATGTTGTTGGTTGAATTTGACCTGCTGAATGTAGCCCAGCTCAAGAACTTCCCTCAGATATTGGTCATCAGGAAATCCTTTCTACC
Ntrk2	NM_012731.1	GGATTCCGGCTTAAAGTTTGTGGCTTACAAGGCGTTTCTGAAGAACGGCAACCTGCGGCACATCAATTTCACTCGAAACAAGCTGACGAGTTTGTCCAGG
Nts	NM_001102381.1	CTGGATGACTTTAGCTTGGAAGCGCTGCTGACCGTATTCCAACTCCAGAAGATCTGCCGCAGCCGGGCCTTTCAACACTGGGAGATAATTCAGGAGGATA
Pax5	NM_001109261.1	TGTGAATGGACGGCCACTCCCAGATGTAGTCCGCCAAAGGATAGTGGAACTTGCCCATCAAGGTGTCAGGCCCTGCGACATCTCCAGGCAGCTTCGGGTC
Pax8	NM_031141.2	GATGGATGATAGTGACCAGGACAGTTGTCGACTGAGCATCGATTCCCAGAGCAGCAGTAGTGGTCCTCGAAAGCATCTTCGTACAGACACCTTCGGGCAG
PEG3	NM_001304816.1	TAAGTGACCAGATTCAATGTGATGAGGAGGGAGAATCCTCCATTTATATCCCAGATATTATTAAGCGAAGGAAGATTCCTGCCAGAGAAGACGCTTATGA
Pgap3	NM_001143895.1	TCTACATGAGCCTAGCTGGCTGGACTTGTCGGGACGACTGCAAGTATGAGTGTATGTGGCTCACTGTTGGTCTCTATCTTCAGGAGGGCTACAGAGTGCC
Pgk1	NM_053291.3	CACTGTTCATGACAGCATGGAAATAACGGTGAGATTCCAGCTGTAGGTTTGGAGTTGATCTATTGAACAATAAAGATGCCCACTGAAACTGAAGAAAAAA
Pih1d1	NM_001024868.1	CAACTTCTACCTGAGGATGCAGAACAGTGATTTCCTGAGGGAACTAGTGGTCACCATTGCCAGGGAGGGCCTTGAAGACAAGTATGGCCTACAACTAAAC
Pink1	NM_001106694.1	GGGCCGCCTCGGCCTGTCAGGAGATCCAGGCAATTTTTACACAGAAAAACAAGCAAGTGTCTGACCCACTGGACACACGACGTTGGCAGGGCTTCCGCCT
Pla2g4c	NM_001145982.1	TGAGATGAGGGAAGTCACTGGCTACAAAAAGGGCAATTTCCTGGAGGTAAATGGGTCCAAAGAGTTGGAGAACAAGAAGGACATTGGGAGACGAAAATGG
Pla2g4d	XM_001080051.5	CTGGAAGGAAATTCAAGACGCAAACAGTCACCAACTCCAGTAATCCTGTGTGGAACGAGACCTTCAGTTTCCTCATCCAGAGTCAGGTCAAGAATATTCT
Plekhb1	NM_172033.2	AGGCAACCTCATAAATCACATGGGAATTTCCTCTAGACACAGCAAACATAACTTCATTTGGCTTTAAGTGTCTGAGGAATGGAACTCACAAGAGAGCAAA
Ppia	NM_017101.1	CCCCATCTGCTCGCAATACCCTGTAATCTCTGCTCTCACTGAAGTTCTTTGGGTTCCATATTTTCCTCATTCCCCTTCAAGTCTAGCAGGATTGCAAAGT
PPM1B	NM_033096.1	TGGATCCCGAGTGGCAAATTACTGTTCAACACATCTATTAGAACACATCACTACCAATGAAGACTTTAGGGCAGCTGACAAATCAGGCTTTGCTCTTGAG
PPP3R1	NM_017309.2	GTCATGGTCTACCACATGACGTTATCCCTTCCCTTCTCTGCAAAGGTACTGGAAGAGAGACATTCTGGATAGTTTTATATGGCAGTCTTCCCTATACAGT
PSMD12	NM_001005875.1	AAACTGAATTCACTGATGTCTCTGGTGAACAAAACGACACACCTCATAGCCAAAGAGGAGATGATACATAATCTACAGTGAGGGTCTGGATGCTTCTAGA
PSMD7	NM_001107426.1	GTGCTGCTCAGTGTGGTGGATCATTTCAACCGAATCGGCAAGGTTGGAAACCAGAAGCGGGTTGTTGGTGTGCTTTTGGGATCATGGCAAAAGAAAGTCC
Pvalb	NM_022499.2	ACCACAAAAAGTTCTTCCAGATGGTGGGCCTGAAGAAAAAGAGTGCGGATGATGTGAAGAAGGTGTTCCACATTCTGGACAAAGACAAAAGTGGCTTCAT
Pxmp4	NM_172223.2	GGCCCACTCTGCAGCCCTCACTACAGTCCTCCATGACCTACCTCTACGAGGACAGCAACGTGTGGCACGACCTCTCAGACTTCCTCATCTTCAACAAGAG
Qdpr	NM_022390.1	TCAGTGCCCAGGAGAACCCTCTTGAAACTCTACTAACCTGTGTCTGTATTGCCGCACCTGGCCCCATGTTGTCTGTATTCCTGTTTGTGGTACGAGATAA
Rangrf	NM_001105790.1	CCTGTGACCGACCAGAGTCTGATCATAGAACTTCTGGAGCTGCAGGCCCACGTGCAGGGCGAAGCGGCTGCGCGGTACCATTTTGAGGACGTTGGCGGGG
Rbp2	NM_012640.2	TCTGACTCAGACGAAGATCATCGTTCAAGACGGTGATAACTTCAAGACAAAAACCAACAGCACGTTCCGCAACTATGACCTAGATTTCACAGTGGGGGTG
Rpl21	NM_053330.1	GGAAGAGTCTACAATGTCACCCAGCATGCCGTGGGCATCATTGTGAACAAGCAAGTTAAAGGCAAGATTCTGGCCAAGAGGATCAATGTGCGGATTGAGC
Rpl23a	NM_001108283.1	CAAAATATCCTCGAAAGAGTGCACCCAGGAGAAACAAGCTTGACCACTATGCTATCATCAAATTCCCACTGACCACCGAGTCAGCTATGAAGAAAATAGA
Rpl30	NM_022699.3	TGTTATGAAAAGTGGAAAGTACGTGCTGGGGTACAAACAGACTCTGAAGATGATCAGACAAGGCAAAGCGAAATTGGTTATCCTCGCCAACAACTGTCCA
Rps24	NM_031112.1	TGGTCATTGATGTCCTTCATCCTGGGAAGGCCACAGTACCAAAGACAGAAATTCGGGAAAAGCTGGCCAAGATGTACAAAACCACACCAGATGTCATCTT
Rps27a	NM_001305443.1	TGTCCTTCTGATGAATGTGGTGCTGGAGTTTTCATGGGTAGCCACTTTGACAGGCATTACTGTGGCAAGTGTTGTCTGACTTACTGCTTCAACAAACCAG
Rps3a	NM_017153.1	GGATGTTCAGGGCAAAAACTGTCTGACTAACTTCCATGGCATGGATCTTACCCGGGACAAAATGTGCTCCATGGTCAAAAAGTGGCAGACCATGATTGAA
Rptn	XM_001054767.3	GTCAGTCAGAGACATTCCATGGGGACTCCCACTATGGTCATTCTGAGAAATCAGACACAGATTATAGCTCAGATCAGTCTGAGTCAGATGGTCAATCTTC
Runx2	NM_001278484.1	TCTCAGAATTTTAACCTAGGCCACAGTTCCTAACGGGCACCATGGCTTTGGTTTCAGGTTAGGGAATGAGGCGCACCCAGCCCATAATAGAAAGACTTAC
S100b	NM_013191.1	CCGAGGACTGTGGGAAGCCGGACTTGATGCTTTCTAACCTGCATATTTGAATGCCGAAGGTCAAACAATCCAAGTTACAGATAAATAAAAACCGCATTGC
Sbsn	NM_001198591.1	GCCAGCACGGAGGGGCCGCAATCACTACAGCAGTATCTGGGGCCTCGGTCAACAAGCCATTTATCAACTTCCCAGCTCTGTGGAGGAGTATCGCCGCCAT
Scn1b	NM_017288.1	AATGTCACCTACAACCACTCTGGCGACTACGAATGTCACGTCTACCGTCTCCTCTTCTTTGATAATTACGAGCACAACACCAGCGTCGTCAAGAAGATCC
Sema3a	NM_017310.1	GGGGCTTTCCATCCAATTTGCACCTATATTGAAGTTGGACATCATCCTGAGGACAACATTTTTAAACTGCAGGACTCACATTTTGAAAACGGTCGTGGGA
Serpinb12	NM_001135867.1	CCCGGAATACTCTGATGACATAACTGAATTTTACCACACAACAATCGAAAGTGTAGATTTCCAGAAGGATACGGAGAAATCAAGAGAAGAGATTAACTTC
Serpinb3a	XM_006221436.3	TGATCACCCTTTCTTATTCCTCATCAAGCACAATGCTACCAACAGCATCCTCTTCTTTGGCAGAATGTCTTCTCCTTAAGTGTGGTGGCTGTGCCTTGTG
Sgk1	NM_001193569.1	CGAGCATCCAGATGCTTGAGGGAAGCATTGCTGCTACAAATATTTCTATTTTTAGAAAGGGTTTTTATGGACCAATGCCCCAGTTGTCAGTCAGAGCCGT
Sgpp2	NM_001191811.1	ACATGCTGGTTTTAGGCCTGACCAAATTTATGGTGGGGATCATGTTGATCCTCTTGGTTCGCCAACTGGTGCAAAACCTCTCTCTGCAAGTGTTATTCTC
Sh3gl2	NM_053935.1	GATTCCAGACGAAGAACTCCGCCAAGCTCTGGAGAAATTTGATGAGTCTAAAGAAATCGCTGAGTCGAGCATGTTCAACCTCTTGGAGATGGATATTGAA
Siglec5	NM_001106249.2	ACCACCTTGCCAAGAACCTTGTCTCCACCATAAATAGTGCAAGCATGATTTCGTCCAACATTCCATTGAGATACCCCATCCAGGATCATCTGAATGAATC
Slc14a1	NM_019346.2	GGGCGACTACTTCTGGTGGTTGATATTCCCTGTATCTGCTATGTCTATGACTTGCCCGGTTTTCTCGAGCGCGTTGAGCTCCCTGTTCAGCAAGTGGGAC
Slc15a1	NM_001079838.1	CACTTCGACAAACAGTGGGCTGAGTATGTTCTGTTCGCCTCCTTGCTCCTGGTCGTCTGCATCATATTTGCCATTATGGCCCGATTCTACACCTACATCA
Slc24a3	NM_053505.1	CCTCGAGTCTTCTCTCACTGGGCTCTGGCTTAATAGATGGTCCACAGATTGTACTGTCTCCTGGGGGAGAATCCAGGCACGTTGGGAATTTAATAATTAG
Slc29a2	NM_031738.1	CCCAGCGTGCCCGGCTGCCCATCATCTTCTGGCAGGATGCCTACTTCATCACATTCATGCTGCTCTTCGCCATTTCCAACGGCTACTTCGTGTCTCTCAC
Slc34a2	NM_053380.1	ATGCCCTTAGAATCAAGATGAAGCCAGTAAGTAGGGTTGGGAGTGTGCATGTGGGAGCTTGTATGGCACAGGATGCAATAGTCAATACGCTGTGCTCATG
Slc6a19	NM_001039722.2	TGCTGGCTCCATCCCTCTGCTAATCATCGCCTTTTGTGAGATGTTTGCTGTCGTCTACGTGTATGGAGTTGACAGGTTCAACAAGGACATCGAGTTCATG
Slc6a4	NM_013034.3	CATTGGTTACGCCATCTGCATCATCGCCTTTTACATCGCCTCCTACTACAACACCATCATAGCCTGGGCGCTCTACTACCTCATCTCCTCCCTCACGGAC
Slpi	NM_053372.1	ATTTGGAAATGGCTCTGGACCCGTGCTCTATATGTTCTGGAAACTACTTCCCTGCTTTCAGGTTTCCCGGTTCCGGGTTCCGGTGCTCTGGGGTGCCCAA
Slurp1	NM_001130544.1	TGGCAGCCTGGAGCATGGGCTATGGTGAGGCCTTCAGATGCTATACCTGTGAGCAGCCCACGGCCATTAACTCATGCAAGAATATTGTTCACTGCAAGCT
Smad7	NM_030858.1	AACCAGAACCAATTGTTTTCATCCCTGTCTTACTGCCTCCTGTCACCCGCTGCCATTGTCGAAGGCTGTCTTTTTTGGCCATCTGCTCCTGGATCTCTCT
SNCA	NM_019169.2	AACAGTGGCTGAGAAGACCAAAGAACAAGTGACAAATGTTGGAGGGGCAGTGGTGACTGGTGTGACAGCAGTCGCTCAGAAGACAGTGGAGGGAGCTGGG
Sparc	NM_012656.1	TGTTGGTTTTAATTTTGGTGAGCCAAGGGGAGGCATGGGCAGACCAATACCTCACTAGGGATTCTCTTACTCAACTGCTATAGGGCTTTCAGGCTCTTGC
Spink5	NM_001170606.1	CTCTAGTGTGGACCAGTCATATTTCAAGTGTTCACTGGCCACATGGAGATGGAGGTGGCTATAGTGGATAATGTAGCTATACCATGATACCATGGAATAA
Spink7	NM_001002816.2	CACAGCAACCTGTTTGTGCAACAGCTTCTCCGAAGTTACCAGCCACCCTTCACCCACAGTGGACTGTGACATATACAAGAAGTACCCAGTAGTGGCCATC
Spock1	NM_001271297.1	TCTACCTAGACAAATATGAGCCCTGTATCAAACCTCTCTTCAACTCGTGTGACTCCTTCAAGGACGGCAAACTCTCCAACAACGAGTGGTGTTACTGCTT
Sprr1a	NM_021864.1	TGCTTTCCATCCTGCTTATGAGTCCCATTGCCTTGTGCTACACATGCTGTGACCTCCAGTCTTAATCCTCCATCCTTGCACCACCTAAAAAGTTGTCTCT
Sprr3	NM_001107686.1	TCAAGTGAAGCAACCTTGTCAGCCTCCACCACAAGGAAAATTTGTTCCCATAGCCACCTCCGAACCATGCCACACTGGTGTTCCACAACCAGGAAACACC
Srd5a1	NM_017070.3	TTGGCCTTCCTGTTCTGCACCTTCAACGGCTATGTACAGAGCAGATACTTGAGCCAGTTTGCGGTTTATGCTGAAGACTGGGTGACCCATCCCTGTTTCC
Stfa3	NM_001105877.1	TCATGAAGGTGGATGTAGGGAATGGTCGTTTCCTTCACATGAAAGTCCTCAGAGGCCTTTCTGGAGACGATGATTTGAAACTTCTTGATTACCAGACTAA
Stom	NM_001011965.1	CCACAACCTAATGATCCCTGTGTGTGGCCTTGTTTAAAGCAGTGAATCTCTGCCACAGGAGTGCTCCCTTCTCTCTCTCGCATATTTTCATGGATCAGGT
Tcf7l2	NM_001191052.1	GCCTCTGTCTCTGGTGACCAAGTCTTTAGAATAGCTTCGCCTCCTCGTCTTCCGTGCCCCTGCTTGATTGAAGTGTTTCCTTCTGGTTCTTGGTTCGCCC
Tert	NM_053423.1	AAAGAAGCAGACCCAGTGTTTCACTCAGAGTCTCAAGACTTTGTTCAGCGTGCTCAACTACGAGCGGACCAAACATCCTAACCTTATGGGTGCTTCAGTA
Tf	NM_001013110.1	GGTTAGCACTGTGCTGACTGCCCAGAAGGATTTATTTTGGAAAGGTGACAAGGACTGCACTGGCAATTTCTGTTTGTTCCGGTCTTCCACCAAGGACCTT
Tg	NM_030988.2	CTTCCTCCACTCTACCCATCTCGTGAGGCTTTCTCTGAGAAGTTTCTACGTGGGAGTGAATATGCCATTCGTTTGGCTGCTCAGTCCACCTTGACCTTCT
Tgm3	NM_001108959.1	AGCTAGGCCAGGTTGCCTCTGGTCTGGGACTTGATCAGTTTTGCACATTTCCTGATTGCCTTCCTGTTCTGTGAACCCTTGACCCTGTCGATCCCTTATA
Them5	NM_001108558.1	CTCTTTACAAGATCCATCCAACTGGAAGGGCAAGGTTATGAGTATGTCATCTTTTTCCACCCATCTGAGAAGAAGTCAGTCTGCCTTTTCCAGCCAGGCC
Tiam1	NM_001100558.1	GTTCATATCATCTCGGGGTCGATTGTGACTGCGTCCGGATGGGAAACCGAGGCAGAGGCGTCGATAGTCACGTTTTCTGGTCTCCCTGCAACATGTCCAT
Tlr3	NM_198791.1	CAGTGGCTAAAATGTTTGGAACATCTCAACATGGACGATAATACTATACCGGGTATAAAAAGCAATACTTTCACAGGATTGGTGAGTCTGAAGTACCTAA
Tm4sf4	NM_053785.1	GGTAATGAGAGCTGTGGGAAGCGATTTGCGATGTTCACCTCCACGTTGTTTGCTGTGGTTGGCTTCTTGGGTGCTGCATACTCATTTATCGTCTCAGCCG
Tmem45b	NM_001033067.1	CTCCTGCTGTTCAGTCTGTTTGGAGCGACCATCAGTATCTGTCTGGAGGTCATCCTCCGAGATAACATTGTGCTGGAGCTTTTCCGAACCACTCTCCTTA
Tmprss11d	NM_001033652.1	TCAGAAGCTACTCGAATCCTCAACAATGGACAGCCACCTTTGGTGTTTCTACAATAAGTCCTAGGTTAAGAGTGAGAGTAAGGGCTATTTTAGCCCATGC
Tmprss4	NM_001108998.1	TATTGTCCCTCCTGTGGTCAATATCATTAAACGGGTATGAGAAATCGCTGGCATAGACTTTTTGGACTGCATGATAAGAATCCAACTAGGACTGTCACAC
TNF	NM_012675.2	GGTGATCGGTCCCAACAAGGAGGAGAAGTTCCCAAATGGGCTCCCTCTCATCAGTTCCATGGCCCAGACCCTCACACTCAGATCATCTTCTCAAAACTCG
Tnni1	NM_017184.1	TCTCGGAGCGCATCCCTACGCTGCAGACCCGCGGTCTTTCCCTCAGCGCCCTTCAGGACTTATGCCGAGAGCTCCATGCCAAGGTGGAGGTGGTGGATGA
Tnnt1	NM_001277260.1	TCGATGTGCACTTTGAGCAGCGGAAAAAGGAAGAGGAGGAACTCATTGCGCTAAAAGACCGTATTGAGAGGCGTCGCGCAGAGAGAGCTGAGCAACAGCG
Tph2	NM_173839.2	TTGTCAGCACGAGCTCTTGGGGGCTTAGCAACAATGCAGTCAATGTTATCCAACATCAACAACTTTCTGTGTCATGGCTGGCTAGTAAGCATGCAATTCC
Tpo	NM_019353.2	CTTCTCTCTTTCTCCAAGCTGCCAGAGTCCACCAGTGGAGCTATTTCCCGAGCAGCAGAGATCATGGAAACATCAATACAAGTCATGAAACGTGAACAAT
Tprg1	NM_001108320.1	TGGAAGTAGAAAGGAACTGATGGTTTTAACCCAACCCATCCTGATTGAGACCTACACAGGGCTCATGTCATTCATTGGAAACCGCAACAAACTTGGCTAT
Trex2	NM_001107580.1	CCCTAACATGGATCCTGAGATTGCAGAGATATCCCTTTTTGCTGTTCACCGATCTTCCTTGGAGAACCCAGAACGGGATGATTCTGGTTCCTTGGTGCTG
Tspan8	NM_133526.1	TATGGTTGAGAGTAAGCAAAGACGGCAAAGAGATTATCACATCCGGTGACAATGGCACGAACCCCTTCATTGCTGTGAATATCTTGATTGCAGTTGGGTC
Tuba1c	NM_001011995.1	CGTGGCCACTACACCATTGGCAAGGAGATCATTGACCTTGTCTTGGACAGAATTCGCAAGCTGGCTGACCAGTGCACGGGTCTCCAGGGCTTCTTGGTTT
UBB	NM_138895.1	TGGCCGCACCCTCTCTGATTACAACATCCAGAAAGAGTCAACCCTGCACCTTGTCCTCCGCCTGAGGGGCGGCATGCAGATCTTCGTGAAGACCCTGACC
Usp18	NM_001014058.1	TTTGCTGTGATTGCCCATGTTGGGATGGCAGACTTCGGTCATTACTGTGCCTACATCCGGAATCCCGTGGATGGAGAATGGTTCTGCTTCAATGATTCAC
Usp53	NM_001106468.1	GCCACTTACAGCCACTTTTGCTGTTTTATGCAAACCCAGATGGTACAGCAGTCTCTACTGAGGACGCACTCAAGCAGGTTGTCCACTGGTCACATTACAA
Usp54	NM_001008863.3	AGGCCTTGTCCGCTCATTGGCAGAGCAGTTCCAGAAGATTCGGAATACTTCCACGAGAGATGTTATAGGTTCCCAGGATCGAAGTTTGCCAAATGGTCTA
Ywhaz	NM_013011.3	TCCTGAACTCCCCAGAGAAAGCCTGCTCTCTTGCAAAAACAGCTTTTGATGAAGCCATTGCTGAACTTGATACATTAAGTGAAGAGTCGTACAAAGACAG
YY1	NM_173290.1	ACCATGTGGTCTTCAGATGAAAAAAAAGATATTGACCATGAAACAGTGGTTGAAGAGCAGATCATTGGGGAGAACTCACCTCCTGATTATTCTGAATATA
Zfp40	NM_001168642.1	TTAAGATATGATGCTCTTAAACCTGTAGACAGGCTACAGTGTGTAGTGTGCTCTGGGTGTCAGGTGTACATAAGCTGTATCTCATGCTGGCTTGGAGCTT
