# Supplementary material for: Predictors of prodromal Parkinson’s disease in young adult Pink1−/− rats
Source: Front Behav Neurosci. 2022 Sep 12;16:867958. doi: 10.3389/fnbeh.2022.867958 (PMC9510667; doi:10.3389/fnbeh.2022.867958)
Supplement: Supplementary file 10 [file Table_10.xlsx]

## Sheet: S2
Table 10. Codeset enrichment analysis using the EnrichR's WikiPathway 2021.
WikiPathway 2021 Human: Relevant Pathways	P-value	Genes
Apoptosis-related network due to altered Notch3 in ovarian cancer WP2864	9.82557e-06	CASP7;CDKN1B;HSPB1;TNF;NFKB1;SMAD7
Parkinson's disease pathway WP2371	2.64657e-05	DDC;CASP7;PINK1;UBB;SNCA
Spinal Cord Injury WP2431	0.000122851	GJA1;CDKN1B;GDNF;IFNG;TNF;KLK8;GFAP
TGF-beta Receptor Signaling WP560	0.000147759	IFNG;TNF;RUNX2;NFKB1;SMAD7
Cytoplasmic Ribosomal Proteins WP477	0.000188332	RPL30;RPL21;RPS3A;RPL23A;RPS27A;RPS24
TGF-beta receptor signaling in skeletal dysplasias WP4816	0.000207724	IFNG;TNF;RUNX2;NFKB1;SMAD7
MAPK Signaling Pathway WP382	0.000529528	NTRK2;PPP3R1;PPM1B;PLA2G4D;PLA2G4C;FGF20;HSPB1;TNF;NFKB1
Vitamin D in inflammatory diseases WP4482	0.00108665	PPP3R1;TNF;NFKB1
Hfe effect on hepcidin production WP3924	0.00177057	HFE;SMAD7
TFs regulate miRNAs related to cardiac hypertrophy WP1559	0.00234626	PPP3R1;NFKB1
Proteasome Degradation WP183	0.00270534	PSMD12;PSMD7;IFNG;UBB
Monoamine Transport WP727	0.00326803	TPH2;TNF;SLC6A4
Parkin-Ubiquitin Proteasomal System pathway WP2359	0.00419704	TUBA1C;PSMD12;PSMD7;SNCA
Serotonin Transporter Activity WP1455	0.00452443	TPH2;SLC6A4
Striated Muscle Contraction Pathway WP383	0.00533514	TNNT1;MYL3;TNNI1
Oxidative Damage WP3941	0.00616376	CDKN1B;TNF;NFKB1
TNF related weak inducer of apoptosis (TWEAK) Signaling Pathway WP2036	0.00706505	CASP7;TNF;NFKB1
Fas ligand pathway and stress induction of heat shock proteins WP314	0.00706505	CASP7;HSPB1;TNF
Vitamin D Receptor Pathway WP2877	0.00738992	SLC34A2;CASP14;CDC34;CDKN1B;KRT13;KLK6
Alzheimer's disease WP2059	0.00766037	CASP7;PPP3R1;TNF;SNCA
ERK Pathway in Huntington's Disease WP3853	0.00842809	NTRK2;CASP7
ATM Signaling Network in Development and Disease WP3878	0.00855643	HSPB1;NFKB1;MTOR
ID signaling pathway WP53	0.00957328	PAX8;PAX5
NO/cGMP/PKG mediated Neuroprotection WP4008	0.00964551	IFNG;TNF;NFKB1
Nuclear Receptors Meta-Pathway WP2882	0.0104839	SLC6A19;CDKN1B;IFNG;ADGRF4;STOM;IRS2;TNF;SLC6A4
Vitamin B12 metabolism WP1533	0.0114241	IFNG;TNF;NFKB1
Brain-derived neurotrophic factor (BDNF) signaling pathway WP2380	0.0114692	TIAM1;NTRK2;IRS2;NFKB1;MTOR
Thyroid hormones production and their peripheral downstream signaling effects WP4746	0.0121772	TPO;TG;PAX8;MTOR
Wnt Signaling Pathway WP363	0.0127078	TCF7L2;GJA1;MTOR
Apoptosis Modulation by HSP70 WP384	0.0133939	CASP7;NFKB1
LTF danger signal response pathway WP4478	0.0133939	TNF;NFKB1
IL-18 signaling pathway WP4754	0.0142721	TF;IFNG;HSPB1;TNF;RUNX2;NFKB1;MYH7
PI3K-Akt signaling pathway WP4172	0.0149111	NTRK2;CDKN1B;DDIT4;FGF20;COL6A5;SGK1;NFKB1;MTOR
Senescence and Autophagy in Cancer WP615	0.0170243	SPARC;CDKN1B;IFNG;MTOR
Transcription factor regulation in adipogenesis WP3599	0.0177653	IRS2;TNF
Novel intracellular components of RIG-I-like receptor (RLR) pathway WP3865	0.0186407	IFNG;TNF;NFKB1
Ebstein-Barr virus LMP1 signaling WP262	0.019339	TNF;NFKB1
Kynurenine Pathway and links to Cellular Senescence WP5044	0.019339	IFNG;TNF
IL1 and megakaryocytes in obesity WP2865	0.020969	IFNG;NFKB1
Thyroid stimulating hormone (TSH) signaling pathway WP2032	0.0239389	CDKN1B;PAX8;MTOR
Cytokines and Inflammatory Response WP530	0.0243933	IFNG;TNF
TLR4 Signaling and Tolerance WP3851	0.0280288	TNF;NFKB1
Non-genomic actions of 1,25 dihydroxyvitamin D3 WP4341	0.0289119	IFNG;TNF;NFKB1
Ras signaling WP4223	0.0295527	TIAM1;NTRK2;PLA2G4D;PLA2G4C;NFKB1
RAS and bradykinin pathways in COVID-19 WP4969	0.029923	TNF;NFKB1
Cell migration and invasion through p75NTR WP4561	0.0318666	NTRK2;TIAM1
PI3K-AKT-mTOR signaling pathway and therapeutic opportunities WP3844	0.0318666	CDKN1B;MTOR
Signal transduction through IL1R WP4496	0.0379837	TNF;NFKB1
Alpha 6 Beta 4 signaling pathway WP244	0.0379837	IRS2;MTOR
Prion disease pathway WP3995	0.0379837	PAX5;NFKB1
Resistin as a regulator of inflammation WP4481	0.0379837	TNF;NFKB1
BDNF-TrkB Signaling WP3676	0.0401146	NTRK2;MTOR
Photodynamic therapy-induced NF-kB survival signaling WP3617	0.0422898	TNF;NFKB1
Apoptosis WP254	0.0441835	CASP7;TNF;NFKB1
