# Supplementary material for: Predictors of prodromal Parkinson’s disease in young adult Pink1−/− rats
Source: Front Behav Neurosci. 2022 Sep 12;16:867958. doi: 10.3389/fnbeh.2022.867958 (PMC9510667; doi:10.3389/fnbeh.2022.867958)
Supplement: Supplementary file 11 [file Table_11.xlsx]

## Sheet: Sheet1
Table 11. Drug repurposing data using ENRICHR's Drug Perturbations GEO DOWN on the up-regulated brainstem gene list.
Drug Perturbations from GeoDown	p-value	Combined Score	Genes
candesartan DB00796 rat GSE2739 sample 2687	4.70461e-08	209.214	TUBA1C;GJA1;DDC;UBB;HSPB1;GAPDH;PPIA;SCN1B;KLK6;GFAP
halothane 3562 rat GSE6433 sample 3652	3.37503e-07	211.012	TUBA1C;UBB;ATP1A3;YWHAZ;GAPDH;SCN1B;KLK6;GFAP
phenytoin 1775 rat GSE2880 sample 2670	7.66592e-07	147.782	TUBA1C;GJA1;PLEKHB1;GDF1;ACSBG1;YWHAZ;GAPDH;KLK6;GFAP
phenytoin DB00252 rat GSE2880 sample 3291	9.70324e-07	141.067	TUBA1C;GJA1;UBB;PLEKHB1;GDF1;YWHAZ;GAPDH;KLK6;GFAP
Bisphenol A 6623 human GSE17624 sample 2657	1.39195e-06	197.29	TUBA1C;CDKN1B;PAX8;UBB;HSPB1;GAPDH;PPIA
Bisphenol A 6623 human GSE17624 sample 2659	2.34751e-06	174.704	TUBA1C;GJA1;PAX8;UBB;HSPB1;GAPDH;PPIA
atorvastatin DB01076 human GSE2450 sample 2484	4.70581e-06	148.134	TUBA1C;GJA1;SPARC;PSMD7;HSPB1;GAPDH;PPIA
phenytoin 1775 rat GSE2880 sample 3034	4.99397e-06	192.333	TUBA1C;UBB;CLSTN1;YWHAZ;GAPDH;PPIA
Bisphenol A 6623 human GSE17624 sample 2663	9.20084e-06	125.861	TUBA1C;GJA1;PAX8;HSPB1;YWHAZ;GAPDH;PPIA
isoflurane 3763 rat GSE6433 sample 3654	1.08205e-05	120.922	TUBA1C;UBB;HSPB1;ATP1A3;YWHAZ;GAPDH;PPIA
isoflurane 3763 rat GSE6433 sample 3653	1.23908e-05	116.919	PAX8;UBB;HSPB1;YWHAZ;GAPDH;PPIA;GFAP
levetiracetam 5284583 rat GSE2880 sample 2671	1.44572e-05	112.5	TUBA1C;PLEKHB1;CLSTN1;GAPDH;PPIA;SNCA;GFAP
resveratrol DB02709 mouse GSE62194 sample 3467	1.52696e-05	91.8971	DDC;PEG3;IRS2;NTS;SLC6A4;KLK6;SNCA;GFAP
phenytoin 1775 rat GSE2880 sample 3033	2.17455e-05	129.233	GJA1;UBB;YWHAZ;GAPDH;PPIA;SNCA
motexafin gadolinium (12 h) DB05428 human GSE2189 sample 3127	2.33591e-05	99.6286	TUBA1C;GJA1;PSMD7;UBB;STOM;GAPDH;PPIA
MLN4924 73014187 human GSE30531 sample 2647	2.68276e-05	96.1499	TCF7L2;CDKN1B;SPARC;UBB;HSPB1;SPOCK1;YWHAZ
trovafloxacin 62959 human GSE9166 sample 2629	2.98421e-05	78.3303	TUBA1C;UBB;MOCOS;HSPB1;STOM;YWHAZ;GAPDH;PPIA
MLN4924 73014187 human GSE30531 sample 2646	3.63726e-05	88.8508	TCF7L2;CDKN1B;SPARC;UBB;HSPB1;IRS2;YWHAZ
diclofenac DB00586 human GSE28185 sample 3058	6.83056e-05	75.1665	TUBA1C;PSMD12;UBB;IRS2;YWHAZ;GAPDH;PPIA
bleomycin DB00290 mouse GSE485 sample 2685	8.94722e-05	178.462	TUBA1C;UBB;YWHAZ;PPIA
levetiracetam 5284583 rat GSE2880 sample 2669	9.42042e-05	68.8702	TUBA1C;USP54;CLSTN1;ACSBG1;YWHAZ;KLK6;GFAP
lapatinib DB01259 human GSE16179 sample 2580	9.77529e-05	172.591	TUBA1C;UBB;GAPDH;PPIA
tretinoin DB00755 mouse GSE484 sample 2826	0.000117771	79.4258	TUBA1C;SPARC;PSMD7;YWHAZ;GAPDH;PPIA
levetiracetam DB01202 rat GSE2880 sample 2777	0.000126842	102.845	TUBA1C;CLSTN1;GAPDH;SCN1B;SNCA
dexamethasone DB01234 rat GSE15563 sample 2713	0.000129457	77.1967	PSMD12;TSPAN8;USP54;CLSTN1;IRS2;PPIA
Mehp 20393 rat GSE4514 sample 3577	0.00013016	101.965	TUBA1C;UBB;ACSBG1;GAPDH;PPIA
methylprednisolone 6741 rat GSE490 sample 3671	0.000139338	61.777	TUBA1C;SPARC;TSPAN8;UBB;HSPB1;PPIA;SCN1B
Harman 5281404 human GSE5080 sample 3482	0.000141373	61.5257	TUBA1C;GJA1;CDKN1B;UBB;SPOCK1;YWHAZ;PPIA
ZINC ACETATE 11192 human GSE2964 sample 3589	0.000155287	96.1166	TUBA1C;PAX5;YWHAZ;GAPDH;PPIA
methylprednisolone 6741 rat GSE490 sample 3668	0.000158418	72.611	TUBA1C;TSPAN8;UBB;GAPDH;PPIA;SCN1B
2,3,7,8-tetrachlorodibenzo-p-dioxin 10852289 mouse GSE2812 sample 3601	0.000179643	91.5072	TUBA1C;GJA1;SPARC;UBB;PPIA
etanercept DB00005 human GSE41663 sample 2605	0.000224067	65.254	TUBA1C;STOM;SBSN;GAPDH;SPRR1A;KLK6
actinomycin D 2019 human GSE6400 sample 3098	0.000227839	64.9156	TUBA1C;PSMD12;CDKN1B;UBB;IRS2;NTS
testosterone 6013 human GSE5106 sample 3206	0.000251535	62.9389	TUBA1C;SPARC;HSPB1;GAPDH;PPIA;SCN1B
estradiol DB00783 human GSE11352 sample 2729	0.000253327	81.3698	TUBA1C;CDKN1B;STOM;GAPDH;PPIA
Rapamycin DB00877 human GSE5824 sample 2459	0.000270474	79.5498	TUBA1C;ATP1A3;YWHAZ;GAPDH;PPIA
imatinib DB00619 human GSE24493 sample 2764	0.000383278	55.056	TUBA1C;GJA1;PSMD12;STOM;YWHAZ;PPIA
resveratrol DB02709 mouse GSE11291 sample 3505	0.000400733	54.2708	SPARC;CLSTN1;ATP1A3;GAPDH;SCN1B;GFAP
carboplatin DB00958 human GSE49577 sample 3174	0.000424673	67.9143	DDC;PSMD12;SPARC;CYYR1;RUNX2
metoprolol DB00264 human GSE3356 sample 2786	0.000431426	96.7344	TUBA1C;UBB;GAPDH;PPIA
d-serine 71077 rat GSE10748 sample 3391	0.000494645	64.3161	TUBA1C;UBB;PLEKHB1;SCN1B;GFAP
isoflurane DB00753 rat GSE1779 sample 2770	0.000532728	62.6239	TUBA1C;UBB;ATP1A3;YWHAZ;PPIA
formaldehyde 712 rat GSE7002 sample 3536	0.000552578	61.8029	PLEKHB1;STOM;SPOCK1;SBSN;SNCA
morphine 5288826 mouse GSE7762 sample 3489	0.000595479	47.6681	TCF7L2;SPARC;PEG3;ATP1A3;YWHAZ;GAPDH
formaldehyde 712 rat GSE7002 sample 3549	0.00064544	46.4057	GJA1;PLEKHB1;STOM;ACSBG1;SBSN;SPRR1A
Bisphenol A 6623 human GSE17624 sample 2658	0.000665985	81.0316	TUBA1C;UBB;GAPDH;PPIA
methylprednisolone 6741 rat GSE490 sample 3672	0.000707537	56.4829	TUBA1C;SPARC;HSPB1;YWHAZ;PPIA
morphine 5288826 mouse GSE7762 sample 3488	0.000707537	56.4829	PEG3;PLEKHB1;ATP1A3;YWHAZ;GAPDH
IFN-gamma1b DB00033 human GSE5542 sample 2476	0.00074459	55.4323	TUBA1C;GJA1;HSPB1;IRS2;GAPDH
Androstanolone 10635 human GSE7868 sample 3411	0.000770088	54.748	TUBA1C;DDC;PEG3;CLSTN1;GAPDH
sunitinib 5329102 rat GSE6929 sample 2491	0.00084644	42.3471	SPARC;TSPAN8;HSPB1;IRS2;SPRR1A;SIGLEC5
aldosterone 5839 mouse GSE434 sample 3655	0.000878664	52.1331	TUBA1C;SPARC;UBB;GAPDH;PPIA
TRICHLOROETHYLENE 6575 mouse GSE24278 sample 3313	0.00106245	48.5455	SLC14A1;PAX8;TSPAN8;SEMA3A;NTS
Lipopolysaccharide 11970143 mouse GSE367 sample 3656	0.00111256	47.7057	TUBA1C;UBB;GDF1;GAPDH;SCN1B
cocaine 446220 human GSE54839 sample 2472	0.00116439	46.8872	GJA1;SPARC;PEG3;UBB;GAPDH
neocarzinostatin 5282473 human GSE1676 sample 3113	0.00129231	45.056	SPARC;IRS2;YWHAZ;GAPDH;PPIA
NICKEL 935 human GSE6281 sample 3480	0.0013502	44.3033	USP53;IRS2;ACSBG1;SPRR1A;KLK6
creatine 586 mouse GSE5140 sample 3205	0.0013842	59.495	SPARC;YWHAZ;GAPDH;PPIA
MT19c compound SID 134222379 human GSE23616 sample 3352	0.00145093	43.0892	SLC14A1;SPARC;PAX8;HSPB1;GAPDH
imatinib DB00619 mouse GSE51698 sample 2522	0.00151397	42.384	TUBA1C;GJA1;SPARC;TSPAN8;YWHAZ
resveratrol DB02709 human GSE36930 sample 3497	0.00157901	41.6955	CDKN1B;SPARC;UBB;PAX5;SNCA
diethylstilbestrol DB00255 rat GSE4028 sample 2715	0.00157901	41.6955	TUBA1C;UBB;PLEKHB1;CLSTN1;PPIA
d-serine 71077 rat GSE10748 sample 3390	0.00159352	55.963	TUBA1C;UBB;PLEKHB1;GFAP
methylprednisolone 6741 rat GSE490 sample 3659	0.00160114	41.4697	TUBA1C;SPARC;HSPB1;YWHAZ;PPIA
Bisphenol A 6623 human GSE17624 sample 2661	0.00164608	41.0233	PAX8;CLSTN1;HSPB1;YWHAZ;PPIA
methylprednisolone 6741 rat GSE490 sample 3673	0.00171524	40.3668	TUBA1C;SPARC;TSPAN8;YWHAZ;PPIA
methylprednisolone 6741 rat GSE490 sample 3660	0.00173876	40.1513	TUBA1C;SPARC;HSPB1;YWHAZ;PPIA
letrozole 3902 human GSE5462 sample 3097	0.00176252	39.9376	TUBA1C;GJA1;HSPB1;GAPDH;PPIA
2,3-dimethoxy-1,4-naphtoquinone (DMNQ) 3136 human GSE39843 sample 3681	0.00176252	39.9376	SPARC;STOM;SBSN;SPRR1A;KLK6
methylprednisolone 6741 rat GSE490 sample 3670	0.00193556	38.4865	TUBA1C;SPARC;UBB;PPIA;SCN1B
pyrazinamide 1046 mouse GSE48027 sample 3325	0.00211456	49.3938	GJA1;SEMA3A;NDNF;SPRR1A
apratoxin A 6326668 human GSE2742 sample 3066	0.00219193	48.6072	TUBA1C;YWHAZ;GAPDH;PPIA
HYPOCHLOROUS ACID 24341 human GSE11630 sample 3199	0.00223133	48.221	UBB;HSPB1;GAPDH;PPIA
TRICHLOROETHYLENE 6575 mouse GSE24278 sample 3321	0.00228956	35.9874	DDC;PAX8;NTS;GAPDH;SIGLEC5
lubiprostone DB01046 mouse GSE18327 sample 2778	0.00240741	35.2657	DDC;SPARC;NTS;GAPDH;PPIA
MLN4924 73014187 human GSE30531 sample 2645	0.00240741	35.2657	TCF7L2;CDKN1B;UBB;IRS2;YWHAZ
rosiglitazone DB00412 rat GSE21329 sample 2844	0.00240741	35.2657	TUBA1C;SPARC;CLSTN1;HSPB1;YWHAZ
apratoxin A 6326668 human GSE2742 sample 3068	0.002521	45.6427	PSMD12;TSPAN8;PPIA;SIGLEC5
imatinib DB00619 human GSE23743 sample 2763	0.00262423	34.0519	TUBA1C;HSPB1;YWHAZ;GAPDH;PPIA
isotretinoin 5282379 human GSE10433 sample 2498	0.00265632	33.8834	PPM1B;TSPAN8;MOCOS;SPOCK1;ACSBG1
HYPOCHLOROUS ACID 24341 human GSE11630 sample 3197	0.00269765	44.2616	UBB;HSPB1;GAPDH;PPIA
ethinyl estradiol DB00977 mouse GSE280 sample 2739	0.00274311	43.9261	HSPB1;STOM;YWHAZ;GAPDH
paclitaxel DB01229 human GSE19136 sample 2576	0.0028211	33.0588	GJA1;SPARC;HSPB1;SPOCK1;GAPDH
haloperidol 3559 mouse GSE6511 sample 2471	0.00283559	43.2666	TUBA1C;UBB;SPOCK1;YWHAZ
EPZ004777 56962336 human GSE29828 sample 2651	0.00288904	32.737	CDKN1B;UBB;HSPB1;YWHAZ;GAPDH
methotrexate DB00563 human GSE11440 sample 2543	0.00295817	32.4196	TUBA1C;TSPAN8;UBB;YWHAZ;KLK6
HYPOCHLOROUS ACID 24341 human GSE11630 sample 3201	0.0029783	42.3048	UBB;HSPB1;GAPDH;PPIA
Coenzyme Q10 5281915 mouse GSE15129 sample 3452	0.00324671	31.1933	PLEKHB1;CLSTN1;HSPB1;ATP1A3;SCN1B
diethylstilbestrol DB00255 rat GSE4028 sample 2716	0.00332192	30.8971	TUBA1C;UBB;PLEKHB1;CLSTN1;PPIA
imatinib DB00619 human GSE28698 sample 2524	0.00335999	30.7505	TUBA1C;UBB;STOM;YWHAZ;PPIA
diethylstilbestrol DB00255 rat GSE4028 sample 2717	0.0034761	30.3166	TUBA1C;UBB;PLEKHB1;CLSTN1;PPIA
trovafloxacin 62959 human GSE9166 sample 2623	0.00359508	29.8914	TUBA1C;PEG3;UBB;GAPDH;PPIA
sapphyrin PCI-2050 (1.25 &Icirc;&frac14;M) 9855235 human GSE6400 sample 3101	0.00359843	38.7608	TUBA1C;PSMD12;CDKN1B;UBB
2,2',4,4',5,5'-Hexachlorobiphenyl (PCB-153) 37034 human GSE6878 sample 3348	0.00376617	37.944	TUBA1C;CDKN1B;PEG3;GAPDH
doxorubicin DB00997 human GSE12972 sample 2720	0.00393917	37.1525	TUBA1C;GJA1;SPARC;HSPB1
dexamethasone DB01234 mouse GSE484 sample 2711	0.00411748	36.3854	TUBA1C;YWHAZ;GAPDH;PPIA
IFN-alphacon1 DB05258 human GSE5542 sample 2473	0.00423935	35.8869	TUBA1C;PSMD7;GAPDH;PPIA
rosiglitazone DB00412 mouse GSE11343 sample 2815	0.00449037	34.9198	PLEKHB1;CLSTN1;HSPB1;PPIA
motexafin gadolinium (24 h) DB05428 human GSE2189 sample 3128	0.00451162	27.1388	TUBA1C;UBB;IRS2;NTS;PPIA
HYPOCHLOROUS ACID 24341 human GSE11630 sample 3198	0.00460684	26.8956	GJA1;PSMD7;UBB;STOM;YWHAZ
PBDE 85 177368 human GSE8588 sample 3051	0.00461957	34.4507	TUBA1C;UBB;HSPB1;GAPDH
resveratrol DB02709 human GSE36930 sample 3498	0.00468511	34.2196	SPARC;UBB;PPIA;SNCA
halothane 3562 rat GSE6433 sample 3651	0.00475126	33.9908	HSPB1;ATP1A3;GAPDH;GFAP
carbidopa DB00190 mouse GSE47099 sample 3293	0.00523209	32.4504	SLC14A1;DDC;NTS;SPRR1A
R1881 13766 human GSE22606 sample 3048	0.00559487	31.4122	DDC;PEG3;TSPAN8;NTS
gatifloxacin 5379 human GSE9166 sample 2626	0.00574459	31.0105	TUBA1C;HSPB1;YWHAZ;PPIA
sapphyrin PCI-2050 (2.5 &Icirc;&frac14;M) 9855235 human GSE6400 sample 3102	0.00589696	30.6164	TUBA1C;PSMD12;CDKN1B;NTS
pioglitazone DB01132 rat GSE20219 sample 2795	0.00605201	30.2295	TUBA1C;UBB;NTS;PPIA
BPDE 41322 human GSE19510 sample 3377	0.00637025	29.4768	TUBA1C;GJA1;SPARC;YWHAZ
acrylamide 6579 rat GSE29004 sample 3110	0.00637025	29.4768	TUBA1C;SPARC;PLEKHB1;SNCA
Retinoic acid 444795 human GSE54464 sample 3141	0.00653347	29.1107	TCF7L2;GJA1;TSPAN8;USP54
trovafloxacin DB00685 human GSE9166 sample 3036	0.007281	21.9613	TUBA1C;UBB;MOCOS;HSPB1;YWHAZ
ascorbic acid 54670067 human GSE11919 sample 3190	0.00748108	27.2107	HSPB1;SPOCK1;IRS2;GAPDH
Bisphenol A 6623 human GSE17624 sample 2662	0.00748108	27.2107	TUBA1C;HSPB1;GAPDH;PPIA
resveratrol DB02709 mouse GSE62194 sample 3466	0.00757149	27.047	TCF7L2;DDC;PEG3;SLC6A4
HYPOCHLOROUS ACID 24341 human GSE11630 sample 3202	0.00766261	26.8847	GJA1;HSPB1;STOM;GAPDH
lapatinib DB01259 human GSE38376 sample 2586	0.00784702	26.5643	TUBA1C;PSMD12;UBB;GAPDH
quercetin 5280343 human GSE13899 sample 3182	0.00803435	26.2494	TUBA1C;IRS2;GAPDH;PPIA
ethanol 702 rat GSE55243 sample 3107	0.00812911	26.094	GJA1;SPARC;YWHAZ;KLK6
Mehp 20393 rat GSE4514 sample 3580	0.00812911	26.094	GJA1;CLSTN1;ACSBG1;PPIA
PLX4720 CID 24180719 human GSE50791 sample 2506	0.00841779	25.6356	TUBA1C;PSMD12;GAPDH;KLK6
acetaminophen DB00316 mouse GSE37874 sample 2482	0.00861395	25.3365	DDC;SPARC;MOCOS;HSPB1
clinafloxacin 60063 human GSE9166 sample 2625	0.00861995	20.3218	TUBA1C;MOCOS;HSPB1;YWHAZ;PPIA
d-serine 71077 rat GSE10748 sample 3388	0.00878404	35.7951	UBB;PLEKHB1;GFAP
PLX4720 CID 24180719 human GSE50791 sample 2505	0.00881309	25.0423	TUBA1C;PSMD12;UBB;KLK6
2,3,7,8-tetrachlorodibenzo-p-dioxin 10852289 rat GSE48100 sample 3111	0.00901524	24.7531	GJA1;PLEKHB1;GDF1;GFAP
soman 7305 rat GSE13428 sample 2638	0.00909187	35.0756	DDC;TSPAN8;SIGLEC5
Methylphenidate DB00422 mouse GSE33619 sample 2499	0.00932411	24.3281	NIPAL4;CLSTN1;SLC6A4;KLK6
3,3',4,4'-Tetrachlorobiphenyl 36187 human GSE6878 sample 3272	0.0097466	23.7777	TUBA1C;PEG3;YWHAZ;GAPDH
deltamethrin 40585 rat GSE7955 sample 3419	0.0097466	23.7777	DDC;SPARC;ATP1A3;KLK6
cytarabine, 2xEC50, 3 d 6253 human GSE6930 sample 3423	0.0106287	22.7291	PSMD12;PSMD7;YWHAZ;GAPDH
ethanol 702 human GSE44456 sample 3037	0.0106287	22.7291	HSPB1;NTS;LRRC63;KLK6
grepafloxacin 72474 human GSE9166 sample 2627	0.010631	18.4106	TUBA1C;MOCOS;HSPB1;STOM;YWHAZ
ubiquinol 9962735 human GSE21351 sample 3448	0.0107424	22.6027	TUBA1C;IRS2;YWHAZ;GAPDH
lung cancer DB00928 human GSE29077 sample 2536	0.010857	22.4773	GJA1;HSPB1;NTS;YWHAZ
pioglitazone DB01132 rat GSE21329 sample 2841	0.0109724	22.3529	TUBA1C;SPARC;HSPB1;YWHAZ
methylprednisolone 6741 rat GSE490 sample 3661	0.0112055	22.107	TUBA1C;TSPAN8;HSPB1;PPIA
MT19c compound SID 134222379 human GSE23616 sample 3353	0.0113232	21.9855	PAX8;UBB;HSPB1;PPIA
Caerulein 16132921 rat GSE5509 sample 3566	0.0114417	21.865	TUBA1C;UBB;GAPDH;PPIA
methylprednisolone 6741 rat GSE490 sample 3665	0.0115611	21.7454	TUBA1C;SPARC;YWHAZ;PPIA
morphine 5288826 mouse GSE7762 sample 3492	0.0118021	21.509	GJA1;PPM1B;PLEKHB1;YWHAZ
estradiol 5757 mouse GSE2195 sample 3619	0.0119239	21.3921	TUBA1C;UBB;YWHAZ;PPIA
Cobalt dichloride hexahydrate 24643 rat GSE51207 sample 3114	0.0119239	21.3921	DDC;PLEKHB1;IRS2;SBSN
adenosine triphosphate 5957 human GSE30903 sample 3221	0.0119239	21.3921	TUBA1C;HSPB1;YWHAZ;PPIA
etanercept DB00005 human GSE41663 sample 2603	0.0126714	20.7097	TUBA1C;YWHAZ;SPRR1A;KLK6
glipizide DB01067 mouse GSE2431 sample 2749	0.0130562	20.38	DDC;UBB;YWHAZ;GAPDH
cytarabine, EC50, 1 d 6253 human GSE6930 sample 3373	0.0131861	20.2718	PSMD7;IRS2;YWHAZ;GAPDH
vemurafenib DB08881 human GSE63790 sample 2508	0.0134484	20.0577	TUBA1C;GAPDH;SCN1B;SIGLEC5
SODIUM BUTYRATE 5222465 mouse GSE4410 sample 3584	0.0137141	19.8468	PEG3;YWHAZ;PPIA;SPRR1A
SODIUM BUTYRATE 5222465 mouse GSE4410 sample 3583	0.013983	19.6391	PEG3;YWHAZ;PPIA;SPRR1A
cisplatin DB00515 human GSE28274 sample 3254	0.0141188	19.5364	TUBA1C;CDKN1B;YWHAZ;GAPDH
Retinoic acid 444795 mouse GSE1588 sample 3631	0.0142553	19.4344	TUBA1C;SPARC;YWHAZ;GAPDH
methylprednisolone 6741 rat GSE490 sample 3667	0.0143928	19.3332	TUBA1C;SPARC;PPIA;SCN1B
d-serine 71077 rat GSE10748 sample 3387	0.014475	26.4675	UBB;PLEKHB1;GFAP
EPZ004777 56962336 human GSE29828 sample 2649	0.0149509	18.9357	TUBA1C;HSPB1;GAPDH;PPIA
Leptin DB05098 mouse GSE3293 sample 3592	0.0150925	18.8381	HSPB1;YWHAZ;GAPDH;PPIA
adenosine triphosphate 5957 human GSE30903 sample 3220	0.015235	18.7412	TUBA1C;UBB;HSPB1;PPIA
lung cancer DB00928 human GSE29077 sample 2535	0.0153783	18.645	GJA1;HSPB1;NTS;YWHAZ
TRICHLOROETHYLENE 6575 mouse GSE24278 sample 3319	0.0170119	17.6314	NIPAL4;PAX8;SEMA3A;NTS
thapsigargin 446378 human GSE19519 sample 3236	0.0170389	23.8916	GJA1;SPARC;BCL7A
luteolin 5280445 human GSE53180 sample 3473	0.0176319	17.282	TUBA1C;HSPB1;GAPDH;PPIA
Cadmium dichloride 24947 rat GSE31503 sample 3282	0.0177171	23.3058	DDC;CDKN1B;IRS2
puromycin, EC50, 5 d 439530 human GSE6930 sample 3270	0.0179471	17.1109	SPARC;PSMD7;HSPB1;GAPDH
EPZ004777 56962336 human GSE29828 sample 2650	0.0185882	16.7757	TUBA1C;HSPB1;GAPDH;PPIA
Lipopolysaccharide 11970143 mouse GSE367 sample 3657	0.0187507	16.6933	PEG3;UBB;PPIA;SCN1B
ubiquinol 9962735 mouse GSE15129 sample 3451	0.0194095	16.3694	PLEKHB1;CLSTN1;ATP1A3;GAPDH
rosiglitazone DB00412 mouse GSE2431 sample 2808	0.0195764	16.2898	TUBA1C;UBB;YWHAZ;PPIA
cyclophosphamide 2907 mouse GSE2254 sample 3627	0.0205797	21.1632	DDC;PEG3;STOM
decitabine 451668 mouse GSE4768 sample 3108	0.023149	19.5919	SPARC;GAPDH;PPIA
dexamethasone DB01234 mouse GSE7683 sample 3524	0.0242235	19.0109	GJA1;SPARC;GAPDH
nicotine 942 human GSE6264 sample 3064	0.0242235	19.0109	TUBA1C;UBB;GAPDH
arachidonic acid 444899 human GSE3737 sample 3119	0.025047	18.5915	HSPB1;GAPDH;PPIA
CYFLUTHRIN 104926 human GSE5023 sample 3572	0.0258855	18.1855	GJA1;SPARC;SPOCK1
estradiol 5757 mouse GSE2195 sample 3625	0.0261684	18.053	TUBA1C;SPARC;PPIA
quercetin DB04216 mouse GSE4262 sample 3428	0.027027	17.6638	PAX8;SPRR1A;SIGLEC5
Chlorpyrifos 2730 human GSE5023 sample 3571	0.0273165	17.5368	GJA1;SPARC;IRS2
formaldehyde 712 rat GSE7002 sample 3551	0.0287892	16.9212	SPARC;SBSN;SPRR1A
pimecrolimus DB00337 human GSE32473 sample 2574	0.0299973	16.4509	TUBA1C;GJA1;PPIA
fenretinide 5288209 rat GSE3952 sample 3559	0.0308205	12.4562	DDC;UBB;YWHAZ;GAPDH
heroin 5462328 mouse GSE30305 sample 2620	0.0309209	16.1105	HSPB1;IRS2;KLK6
bexarotene DB00307 human GSE12791 sample 2681	0.0309209	16.1105	TUBA1C;GAPDH;PPIA
nitric oxide 145068 human GSE13887 sample 3181	0.0312641	12.3472	TUBA1C;UBB;YWHAZ;PPIA
cyclophosphamide 2907 mouse GSE2254 sample 3628	0.0318594	15.7801	DDC;SPARC;UBB
heroin 5462328 mouse GSE30305 sample 2666	0.0321628	12.1329	PSMD12;SPARC;YWHAZ;SPRR1A
titanium dioxide NA mouse GSE7475 sample 2824	0.0334568	15.2508	HSPB1;PPIA;SPRR1A
mycophenolic acid DB01024 human GSE14630 sample 3302	0.0334568	15.2508	CDKN1B;CLSTN1;YWHAZ
2,3,7,8-tetrachlorodibenzo-p-dioxin 10852289 mouse GSE2812 sample 3600	0.0337812	15.148	PSMD7;UBB;PPIA
ubiquinol 9962735 mouse GSE15129 sample 3457	0.0354281	14.6486	SPARC;HSPB1;GAPDH
pioglitazone DB01132 human GSE8157 sample 2796	0.0360983	14.4554	SPARC;GDF1;GAPDH
bleomycin DB00290 mouse GSE2640 sample 2851	0.0367752	14.2658	PLEKHB1;CLSTN1;PPIA
formaldehyde 712 rat GSE7002 sample 3547	0.0371161	14.1724	HSPB1;IRS2;SBSN
cytarabine, EC50, 5 d 6253 human GSE6930 sample 3375	0.0373775	11.0399	PSMD12;PSMD7;HSPB1;YWHAZ
MLN4924 73014187 human GSE30531 sample 2644	0.0381485	13.8972	SPARC;UBB;IRS2
valproic acid DB00313 mouse GSE9247 sample 2838	0.0384959	13.8071	GJA1;SPARC;PPIA
R1881 13766 human GSE22606 sample 3049	0.0384959	13.8071	DDC;PEG3;NTS
MLN4924 73014187 human GSE30531 sample 2643	0.0384959	13.8071	TUBA1C;SPARC;UBB
Androstanolone 10635 human GSE7868 sample 3410	0.0391957	13.6295	DDC;PEG3;HSPB1
soman 7305 rat GSE13428 sample 2635	0.0398564	21.3729	DDC;SIGLEC5
trastuzumab DB00072 human GSE31432 sample 3123	0.0399019	13.4552	TUBA1C;GJA1;UBB
Bisphenol A 6623 human GSE17624 sample 2654	0.0402575	13.3692	UBB;HSPB1;PPIA
Lapatinib DB01259 human GSE38376 sample 2583	0.0409734	13.1995	TUBA1C;PSMD12;GAPDH
PBDE 47 95170 human GSE8588 sample 3050	0.0413339	13.1158	TUBA1C;PEG3;HSPB1
PLX4720 CID 24180719 human GSE50791 sample 2507	0.0416959	13.0328	TUBA1C;GAPDH;KLK6
resveratrol DB02709 mouse GSE11291 sample 3504	0.0420596	12.9506	SPARC;HSPB1;YWHAZ
FGFR-specific PD173074 inhibitor 1401 human GSE52452 sample 3244	0.0435303	12.6291	SLC14A1;USP54;SPRR1A
doxorubicin, 2xEC50, 5 d 31703 human GSE6930 sample 3265	0.0438656	9.95251	GJA1;PSMD12;PSMD7;IRS2
2,3,7,8-tetrachlorodibenzo-p-dioxin 10852289 human GSE24193 sample 3189	0.043902	12.5504	CDKN1B;GAPDH;PPIA
Promyelocytic leukemia DB00755 human GSE5007 sample 2461	0.043902	12.5504	TUBA1C;GAPDH;PPIA
soman 7305 rat GSE13428 sample 2632	0.0442611	19.4843	DDC;SIGLEC5
permethrin DB04930 rat GSE7955 sample 3417	0.0442753	12.4725	NTRK2;SPARC;ACSBG1
estradiol 5757 human GSE12446 sample 3203	0.0446502	12.3952	CDKN1B;IRS2;NDNF
methylprednisolone 6741 rat GSE490 sample 3666	0.0446502	12.3952	TUBA1C;TSPAN8;PPIA
HYPOCHLOROUS ACID 24341 human GSE11630 sample 3200	0.0450267	12.3186	GJA1;STOM;GAPDH
hydrocortisone DB00741 human GSE7890 sample 2751	0.0454048	12.2427	GJA1;SPARC;SPOCK1
carboplatin DB00958 human GSE49577 sample 3178	0.0454048	12.2427	IRS2;GAPDH;KLK6
Ascorbyl-2-phosphate 54679073 human GSE11919 sample 3191	0.0457845	12.1675	SPOCK1;IRS2;GAPDH
aminolevulinic acid DB00855 human GSE8920 sample 2575	0.0457845	12.1675	GJA1;TSPAN8;NTS
Hodgkin lymphoma CID 148177 human GSE31059 sample 2494	0.0465487	12.0189	TUBA1C;PSMD7;GAPDH
BPDE 41322 human GSE19510 sample 3379	0.0473192	11.8728	TUBA1C;GAPDH;PPIA
lapatinib DB01259 human GSE38376 sample 2585	0.0477069	11.8007	TUBA1C;PSMD12;UBB
2,3,7,8-tetrachlorodibenzo-p-dioxin (TCDD) 15625 human GSE16160 sample 3426	0.0477069	11.8007	PSMD12;IRS2;KLK6
bicalutamide DB01128 human GSE7708 sample 3088	0.0480961	11.7293	UBB;HSPB1;YWHAZ
motexafin gadolinium (4 h) DB05428 human GSE2189 sample 3125	0.0480961	11.7293	TUBA1C;HSPB1;GAPDH
vemurafenib DB08881 human GSE63790 sample 2509	0.0496688	11.4494	TUBA1C;SCN1B;SIGLEC5
methylprednisolone 6741 rat GSE490 sample 3658	0.0500659	11.3809	TUBA1C;SPARC;HSPB1
pioglitazone DB01132 rat GSE20219 sample 2794	0.0504646	11.3129	PLEKHB1;SCN1B;GFAP
doxycycline DB00254 mouse GSE29848 sample 3208	0.0508648	11.2456	GJA1;HSPB1;PPIA
VANADIUM PENTOXIDE 14814 human GSE5339 sample 3558	0.0512497	8.96783	TCF7L2;PPM1B;CDKN1B;IRS2
rosiglitazone DB00412 rat GSE7193 sample 2811	0.05167	11.1125	TUBA1C;UBB;IRS2
quercetin DB04216 mouse GSE4262 sample 3430	0.0520749	11.0468	HSPB1;SPRR1A;SLC6A4
3,3',4,4'-Tetrachlorobiphenyl 36187 human GSE6878 sample 3273	0.0520749	11.0468	TUBA1C;GAPDH;PPIA
Lapatinib DB01259 human GSE38376 sample 3252	0.0524814	10.9816	UBB;HSPB1;YWHAZ
progesterone 5994 mouse GSE6440 sample 3686	0.0528894	10.917	PAX8;TSPAN8;IRS2
folic acid DB00158 human GSE17635 sample 2748	0.053299	10.8529	SLC14A1;NTRK2;SPARC
